# Supplementary material
Source: Springer Nature journal article supplement (http://www.springermedizin.de/resource/supplementary/13023_2009_165_MOESM5_ESM.pdf/9641808)

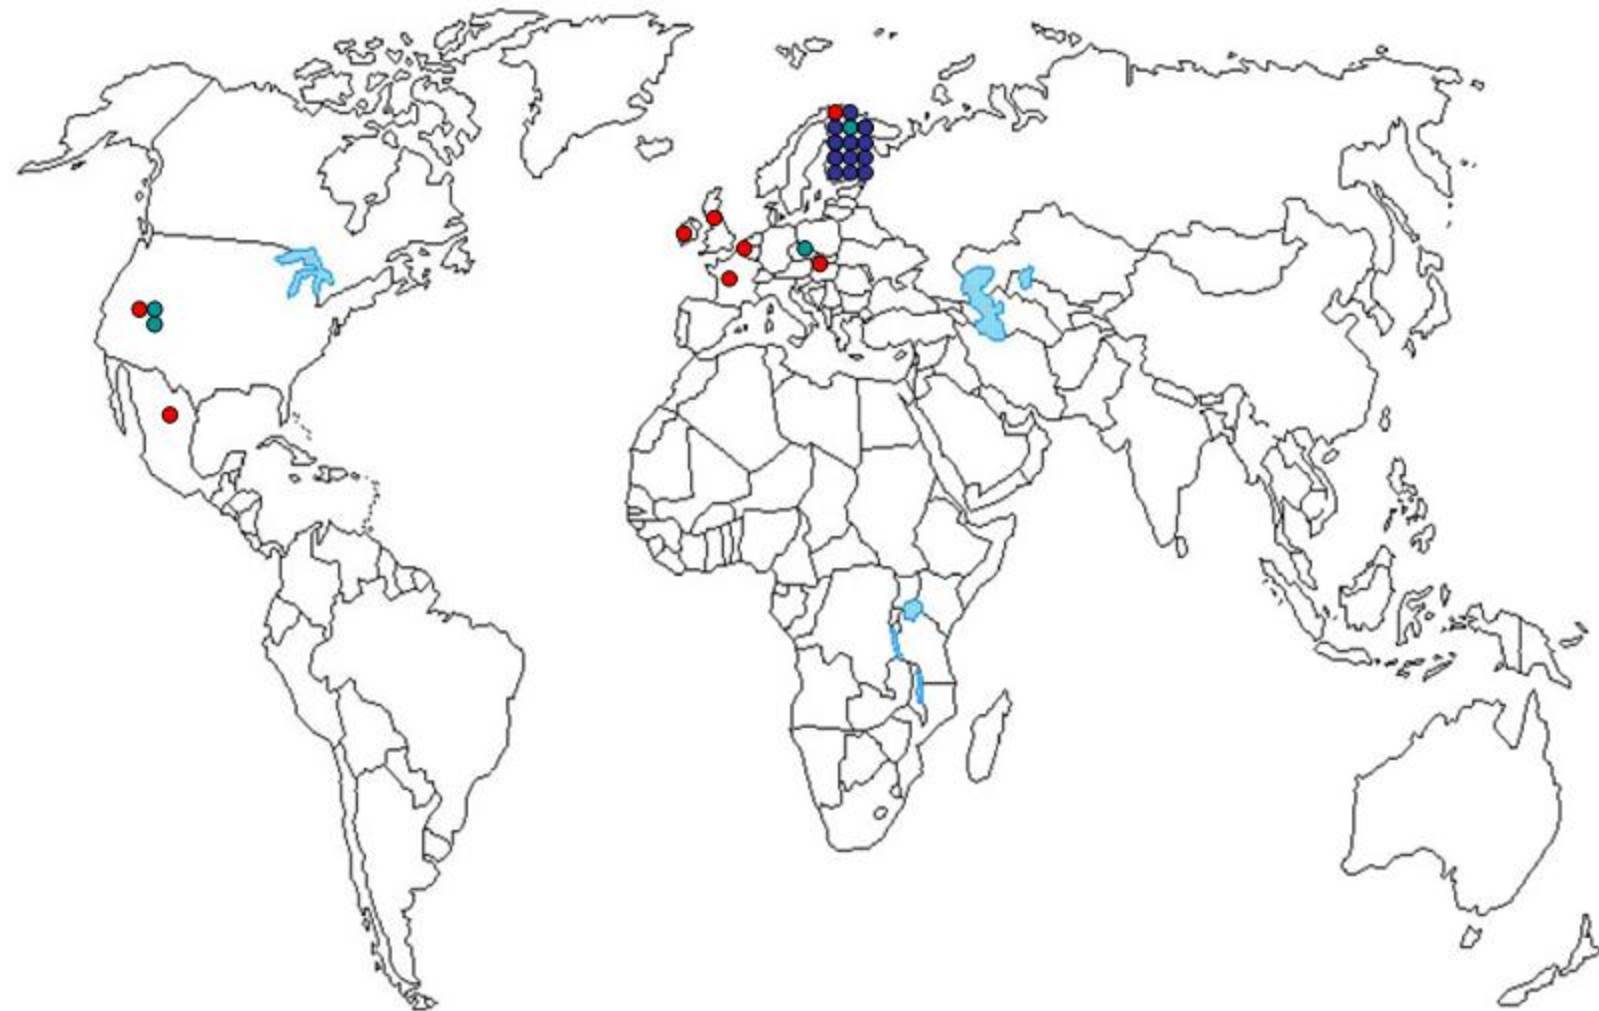

Exon 9 nonsense  
c.1573delT

Exon 14 nonsense  
c.2269 C>T

Intron 7  
c.1390+2delT

Supplement: MOESM5 [file 9641808]
